# Supplementary material for: Novel monocyte sub-populations revealed by detailed analysis of CD43 and CD11b expression in Sprague Dawley rats
Source: Research Square preprint supplement (doi:10.21203/rs.3.rs-3784322/v2), 2024-01-17
Supplement: Supplementary file 1 [file 1b382a8898339765e9731227.xlsx]

## Sheet: Sheet1
	A
		NK Cells	B Cells	Pan T Cells	CD4 T cells	CD8 T cells	Pan Monocytes	CD43Hi/	CD43Hi/	CD43Lo/	CD43Lo/
								CD11bLo	CD11bHi	CD11bHi	CD11bLo
	Male	3.4 ± 0.5	27.5 ± 2.6	56.4 ± 4.0	70.1 ± 2.6	25.8 ± 2.4	8.1 ± 1.6	60.6 ± 5.9	14.7 ± 4.3	7.2 ± 2.4	22.2 ± 5.3
	Female	5.3 ± 0.9	23.2 ± 4.4	61.7 ± 4.0	72.0 ± 1.6	23.7 ± 1.8	7.1 ± 1.1	62.7 ± 3.8	13.9 ± 3.2	3.6 ± 0.8	19.8 ± 5.1
	p value	0.23	0.23	0.18	0.75	0.49	0.75	0.57	0.95	0.18	0.66
	B
			NK Cells	B Cells	Pan T cells	CD4 T cells	CD8 T cells	Pan Mono-cytes	CD43Hi/	CD43Hi/	CD43Lo/	CD43Lo/
									CD11bLo	CD11bHi	CD11bHi	CD11bLo
	Female	Young Adult	5.3 ± 0.9	23.2 ± 4.4	61.7 ± 4.0	71.9 ± 1.6	23.7 ± 1.7	7.1 ± 1.1	62.7 ± 3.8	13.9 ± 3.2	3.6 ± 0.8	19.8 ± 5.1
		Aged Adult	3.9 ± 1.9	23.6 ± 1.8	49.5 ± 0.6	72.4 ± 1.4	25.4 ± 1.3	19.4 ± 0.2	77.7 ± 0.3	5.4 ± 1.1	1.6 ± 0.009	15.4 ± 0.8
		p value	0.71	0.71	0.18	0.71	0.89	0.044 *	0.18	0.18	0.18	0.99
	Male	Young Adult	3.4 ± 0.5	27.5 ± 2.6	56.4 ± 4.0	70.0 ± 2.6	25.8 ± 2.5	8.1 ± 1.6	60.6 ± 5.9	14.7 ± 4.3	7.2 ± 2.4	22.2 ± 5.3
		Aged Adult	4.1 ± 0.6	31.2 ± 7.9	45.5 ± 4.2	74.6 ± 1.5	22.1 ± 0.7	15.6 ± 2.2	72.2 ± 1.0	10.3 ± 1.5	2.6 ± 0.3	15.0 ± 2.8
		p value	0.43	0.99	0.071	0.29	0.86	0.27	0.86	0.29	0.64	0.64
