# Supplementary material for: Novel monocyte sub-populations revealed by detailed analysis of CD43 and CD11b expression in Sprague Dawley rats
Source: Research Square preprint supplement (doi:10.21203/rs.3.rs-3784322/v2), 2024-01-17
Supplement: Supplementary file 2 [file ebc1624ddb6256901a56b480.xlsx]

## Sheet: Sheet1
		ANTIBODY	FLUOROCHROME	CLONE	DILUTION (µL/106 cells)	SUPPLIER
	Blocking	CD32	-	D34-485	10	BD Biosciences
	Viability	Fixable viability stain	780	-	1	BD Biosciences
	Hemopoietic Marker	CD45	BUV395	OX-1	1.25	BD Biosciences
	Pan T cells	CD3	BV605	1F4	1.25	BD Biosciences
	Helper T cells	CD4	Horizon V450	OX-35	0.625	BD Biosciences
	Cytotoxic T cells	CD8a	BV786	OX-8	2.5	BD Biosciences
	B cells	CD45R	BUV737	HIS24	1.25	BD Biosciences
	NK cells	CD161a	Alexa 647	1978-10-01	1.25	BD Biosciences
	Monocytes	CD11b	FITC	WT.5	1	BD Biosciences
		CD43	PE/Cy7	W3/13	0.625	BioLegend
		CD172a	PE	OX-41	0.125	BioLegend
		RT1D	BV480	OX-17	2.5	BD Biosciences
